# Supplementary material for: Imprinted SARS-CoV-2-specific memory lymphocytes define hybrid immunity
Source: bioRxiv or medRxiv preprint supplement (doi:10.1101/2022.01.12.22269192), 2022-01-13
Supplement: Supplementary file [file media-1.pdf]

Figure S1

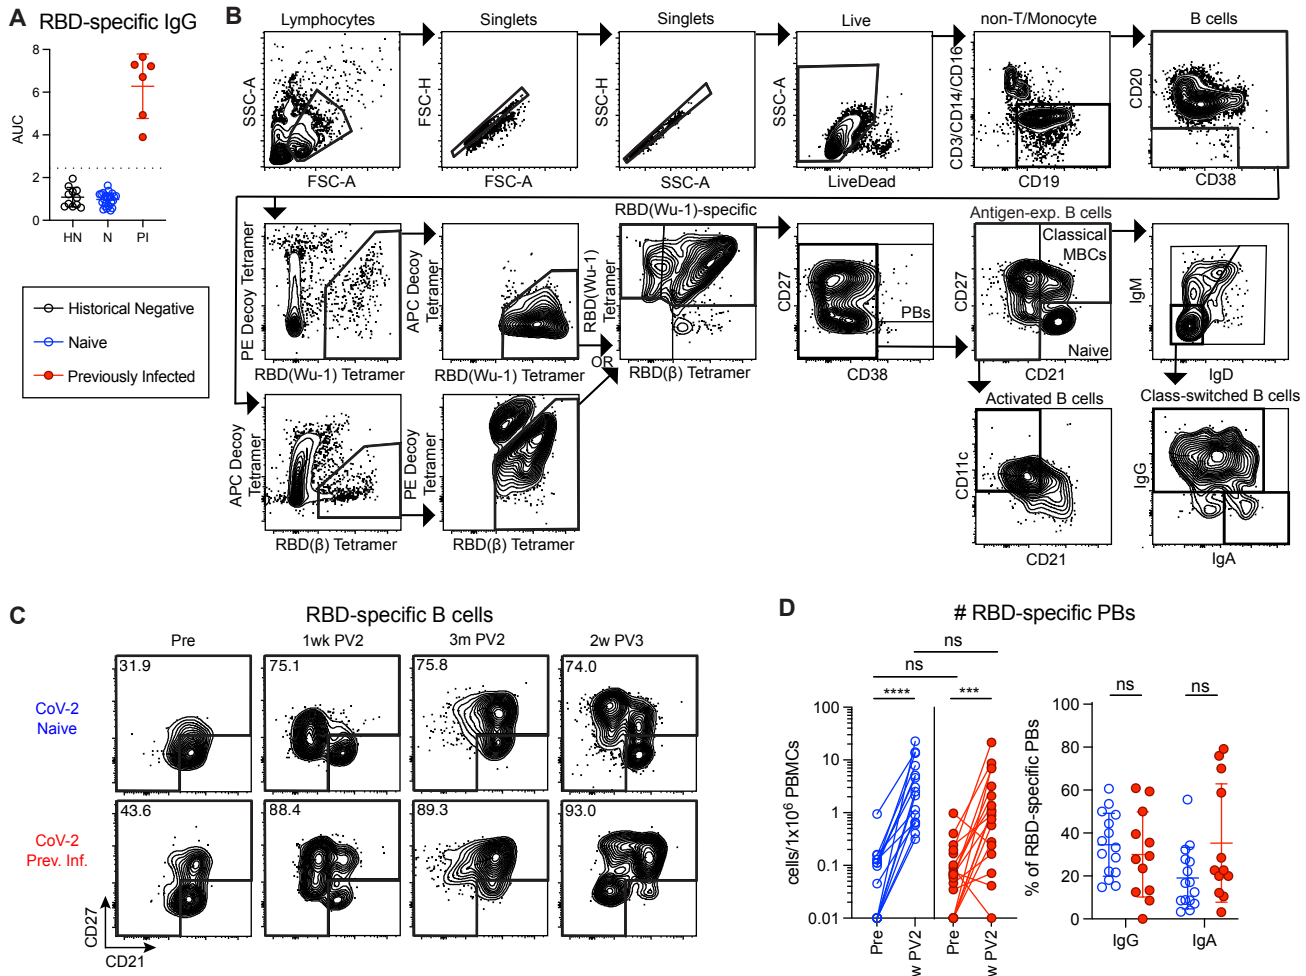

Figure S2

A

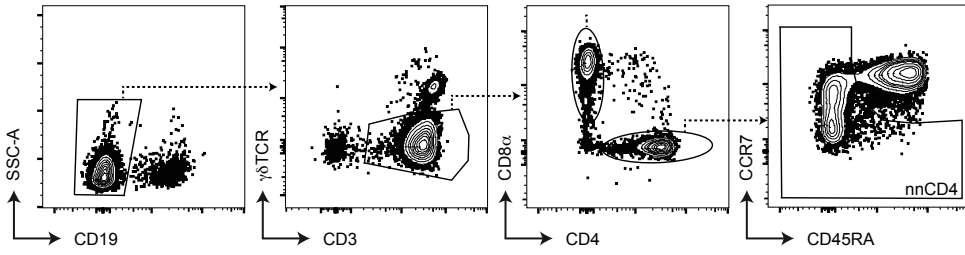

B

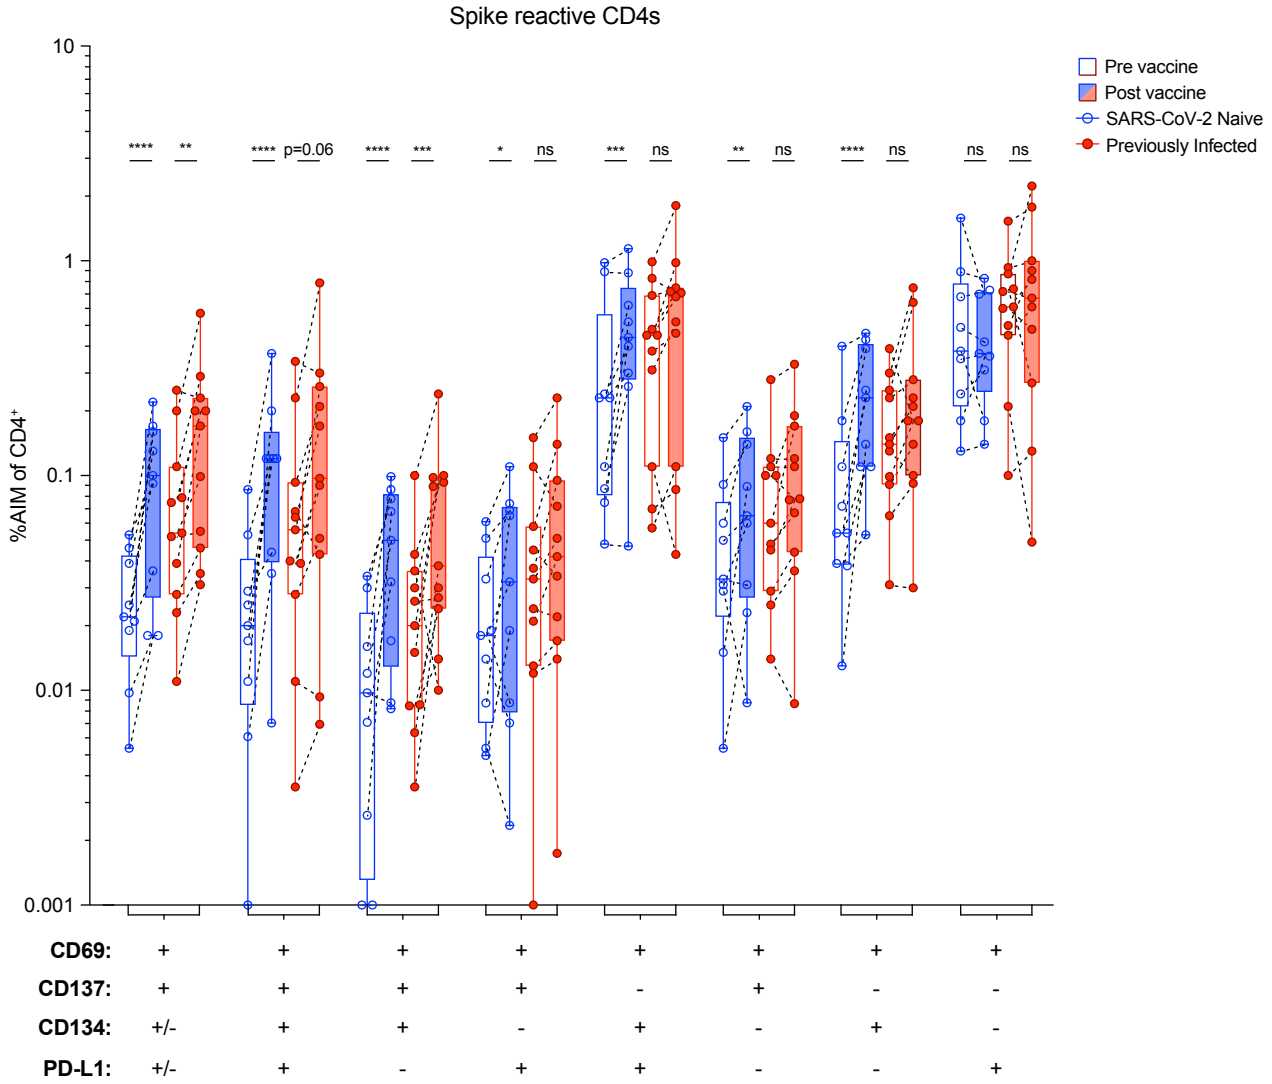

C

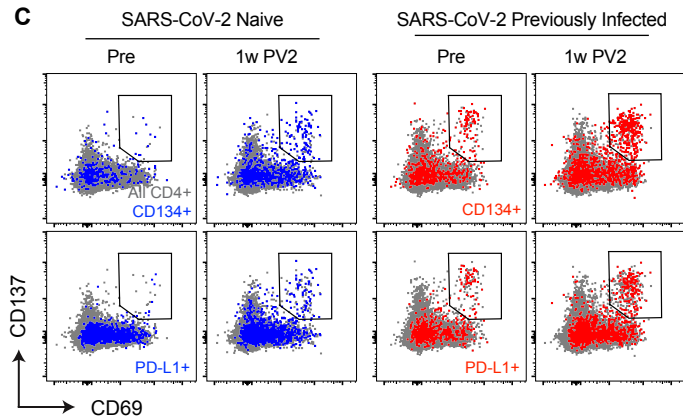

D

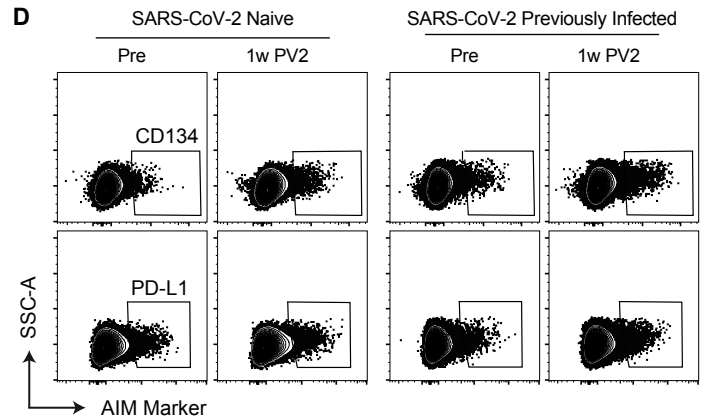

Figure S3

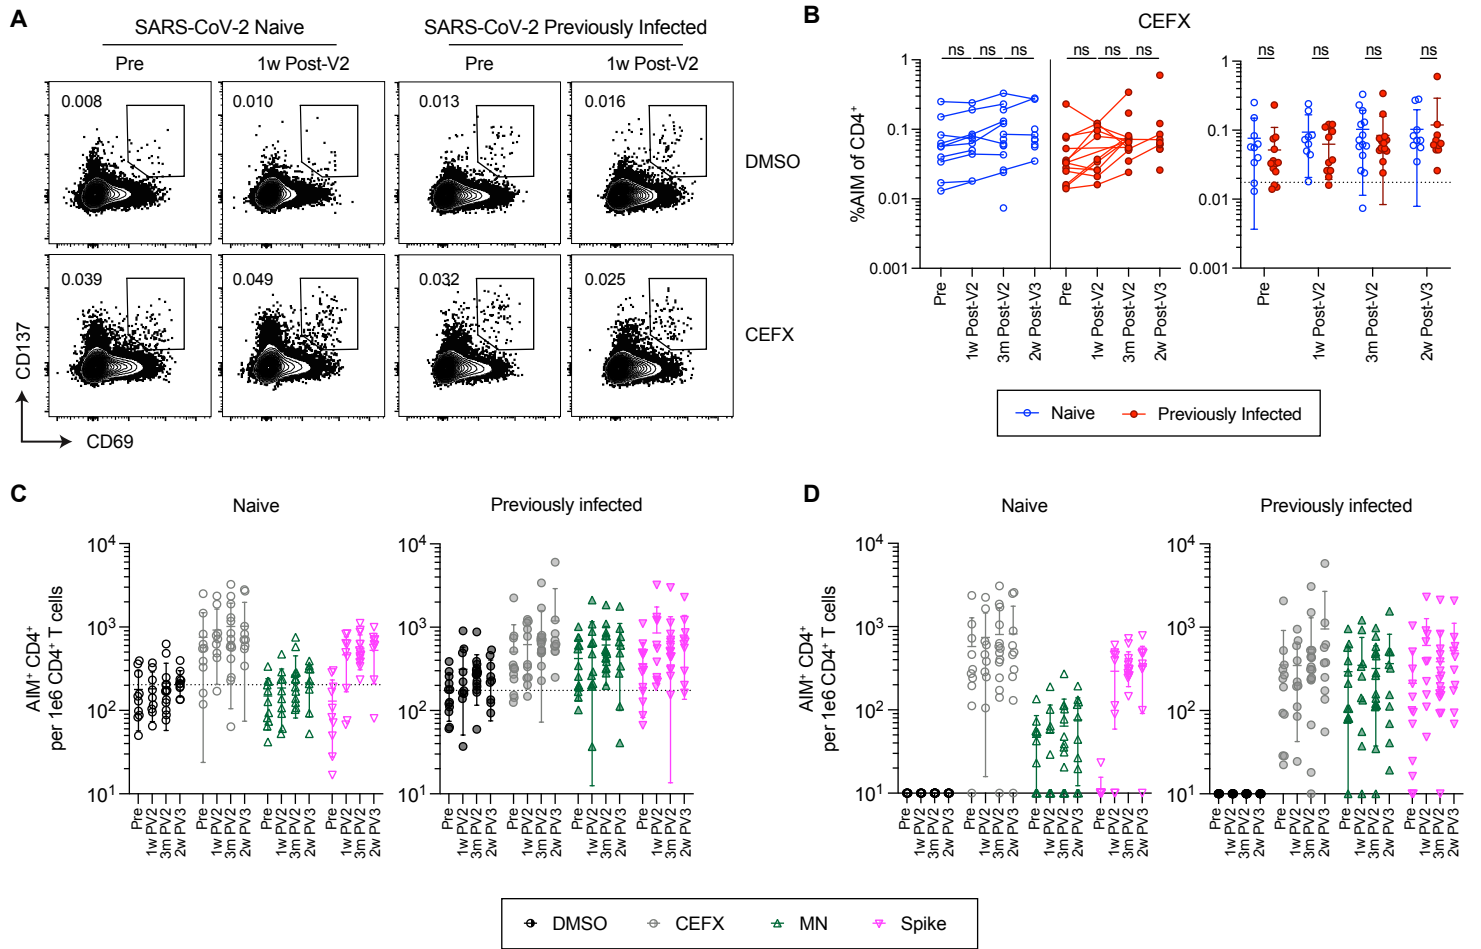

Figure S4

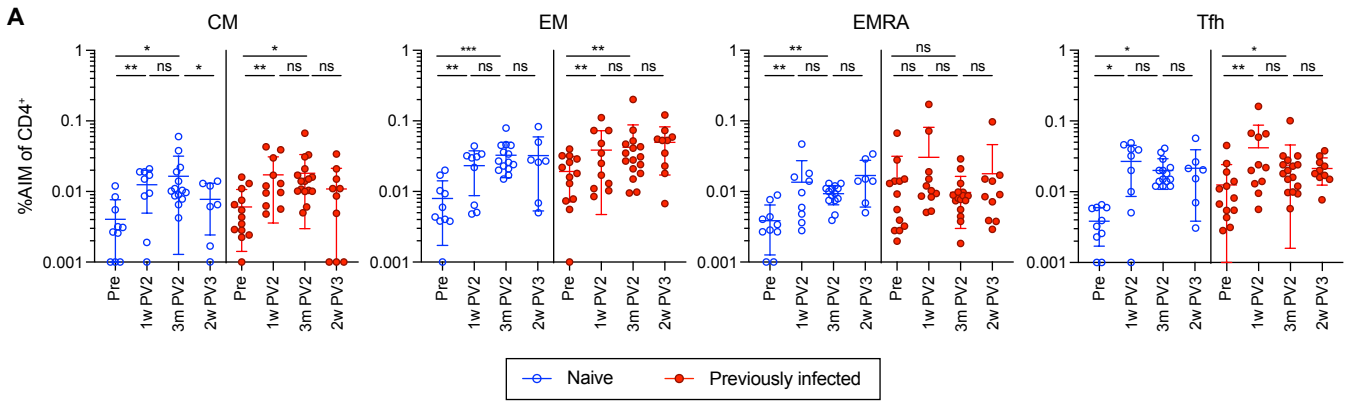

Figure S5

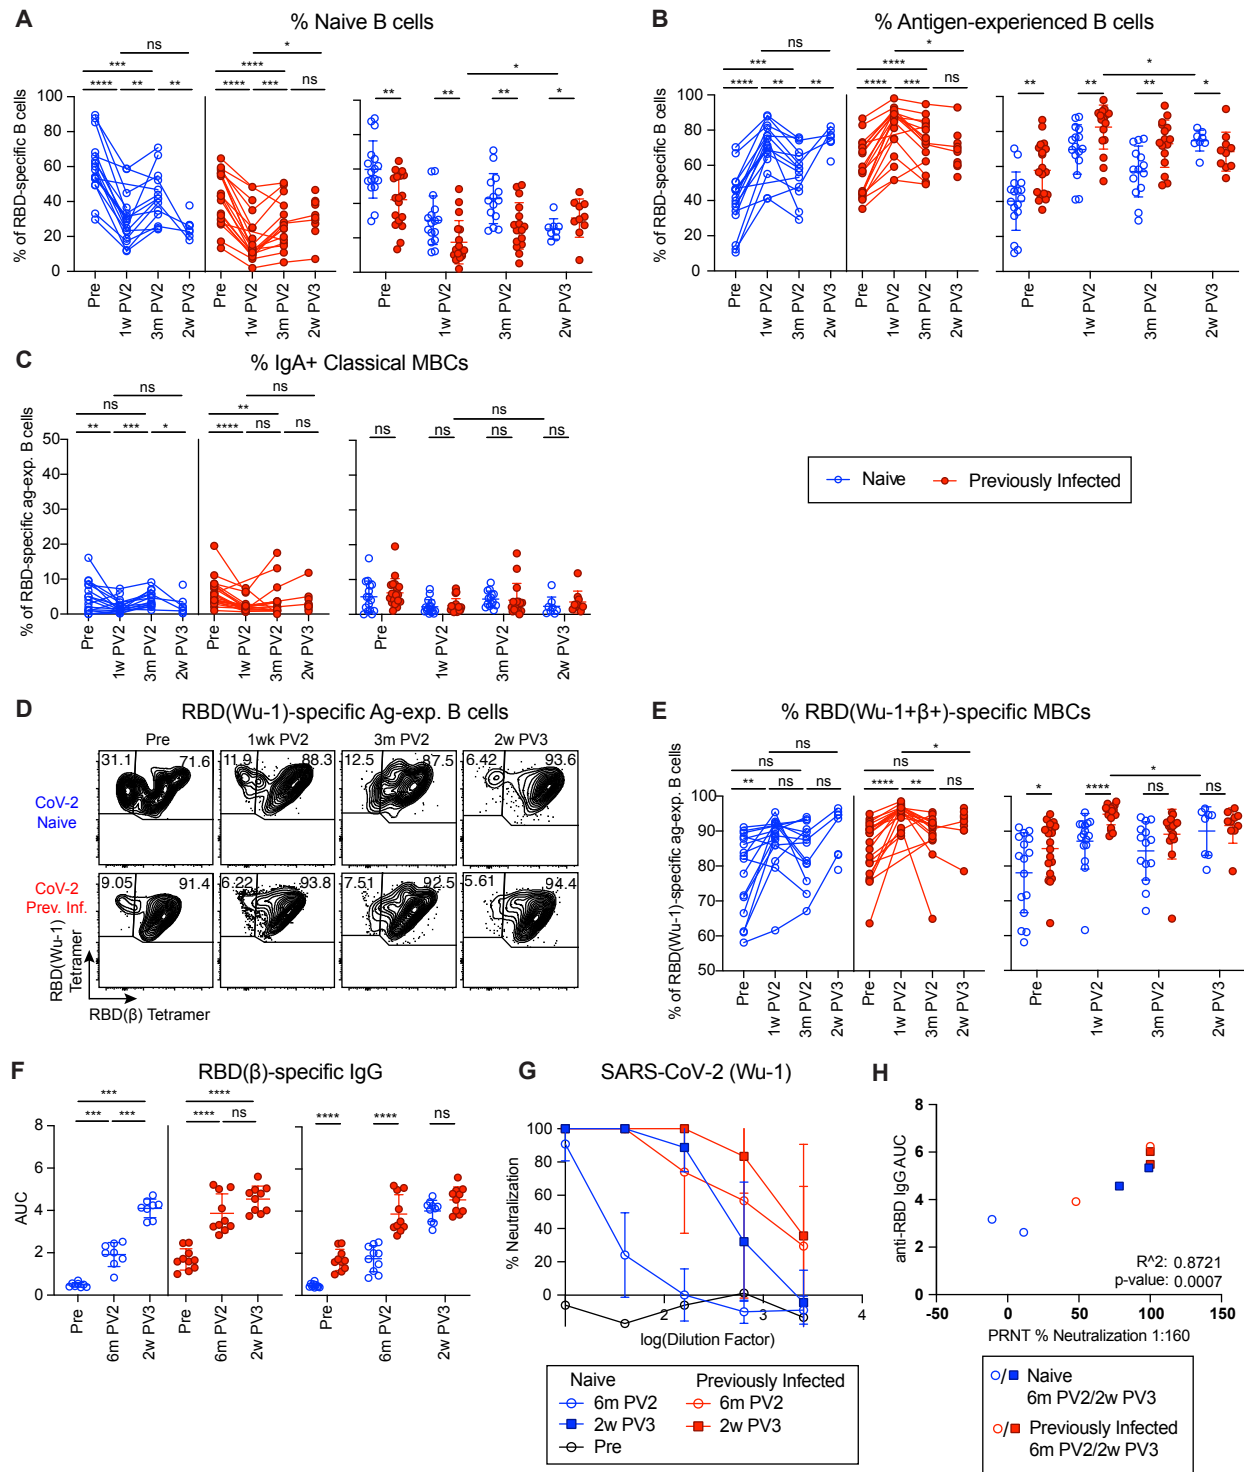

Figure S6

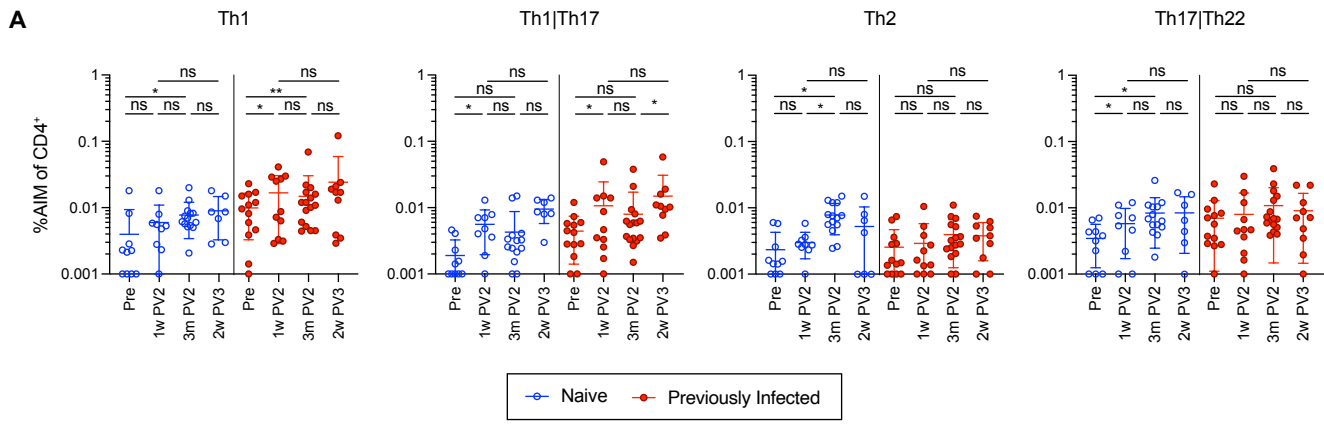

Figure S7

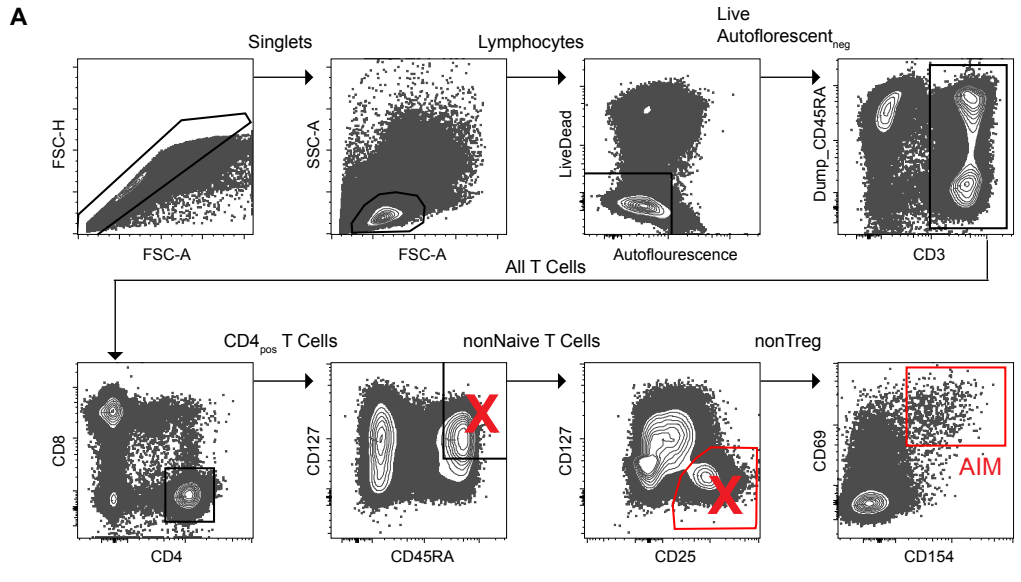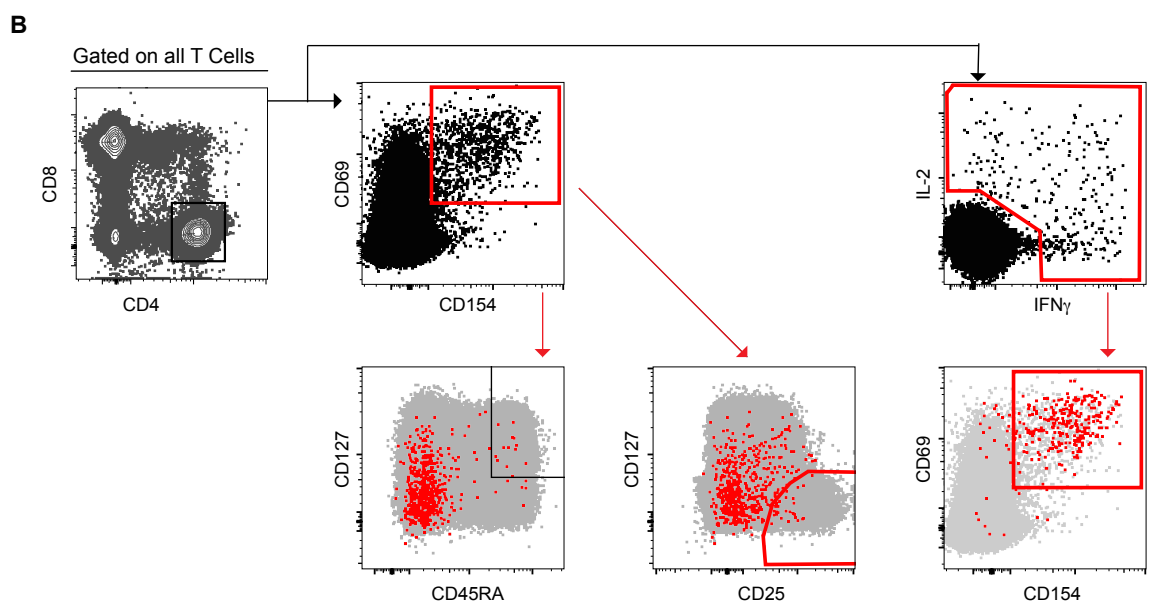

Figure S8

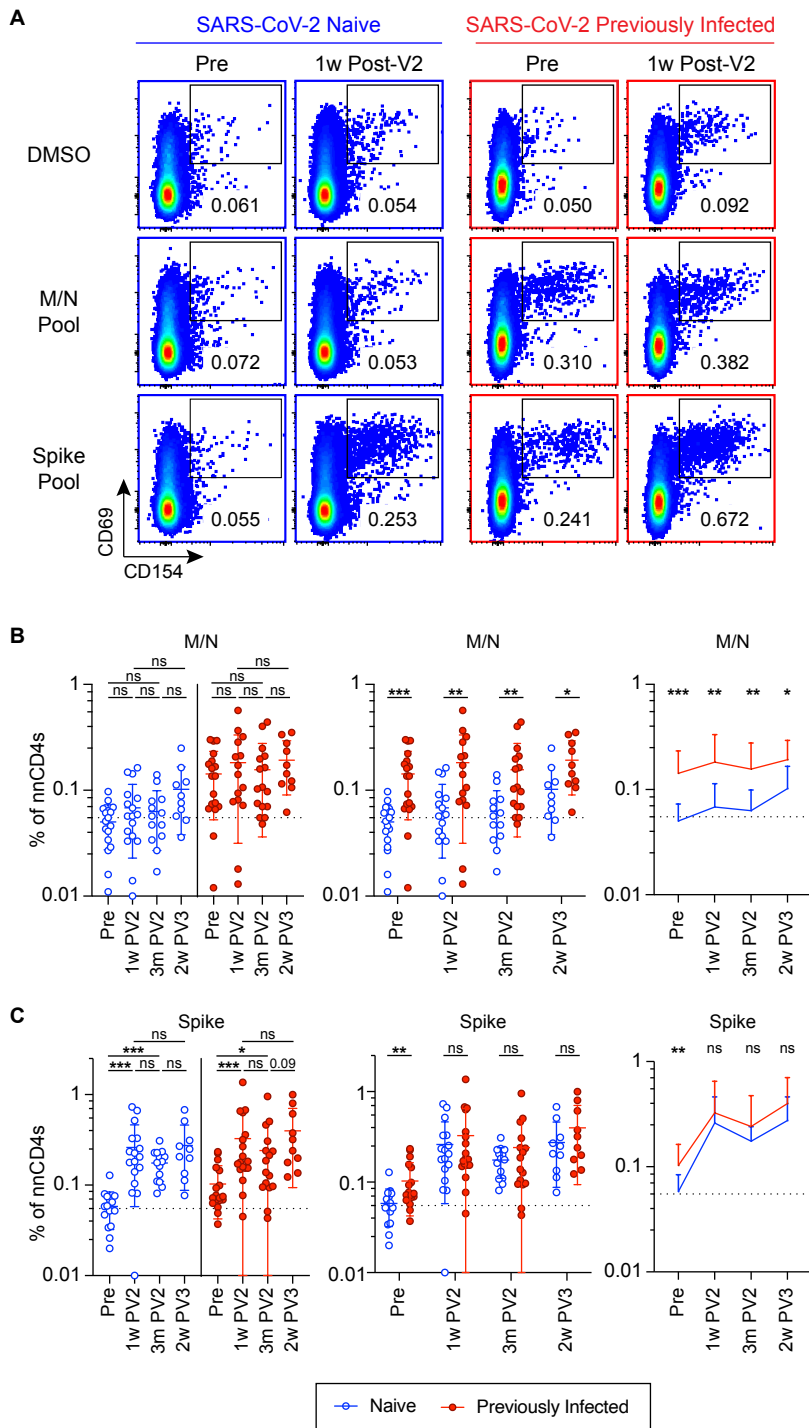



Figure S9

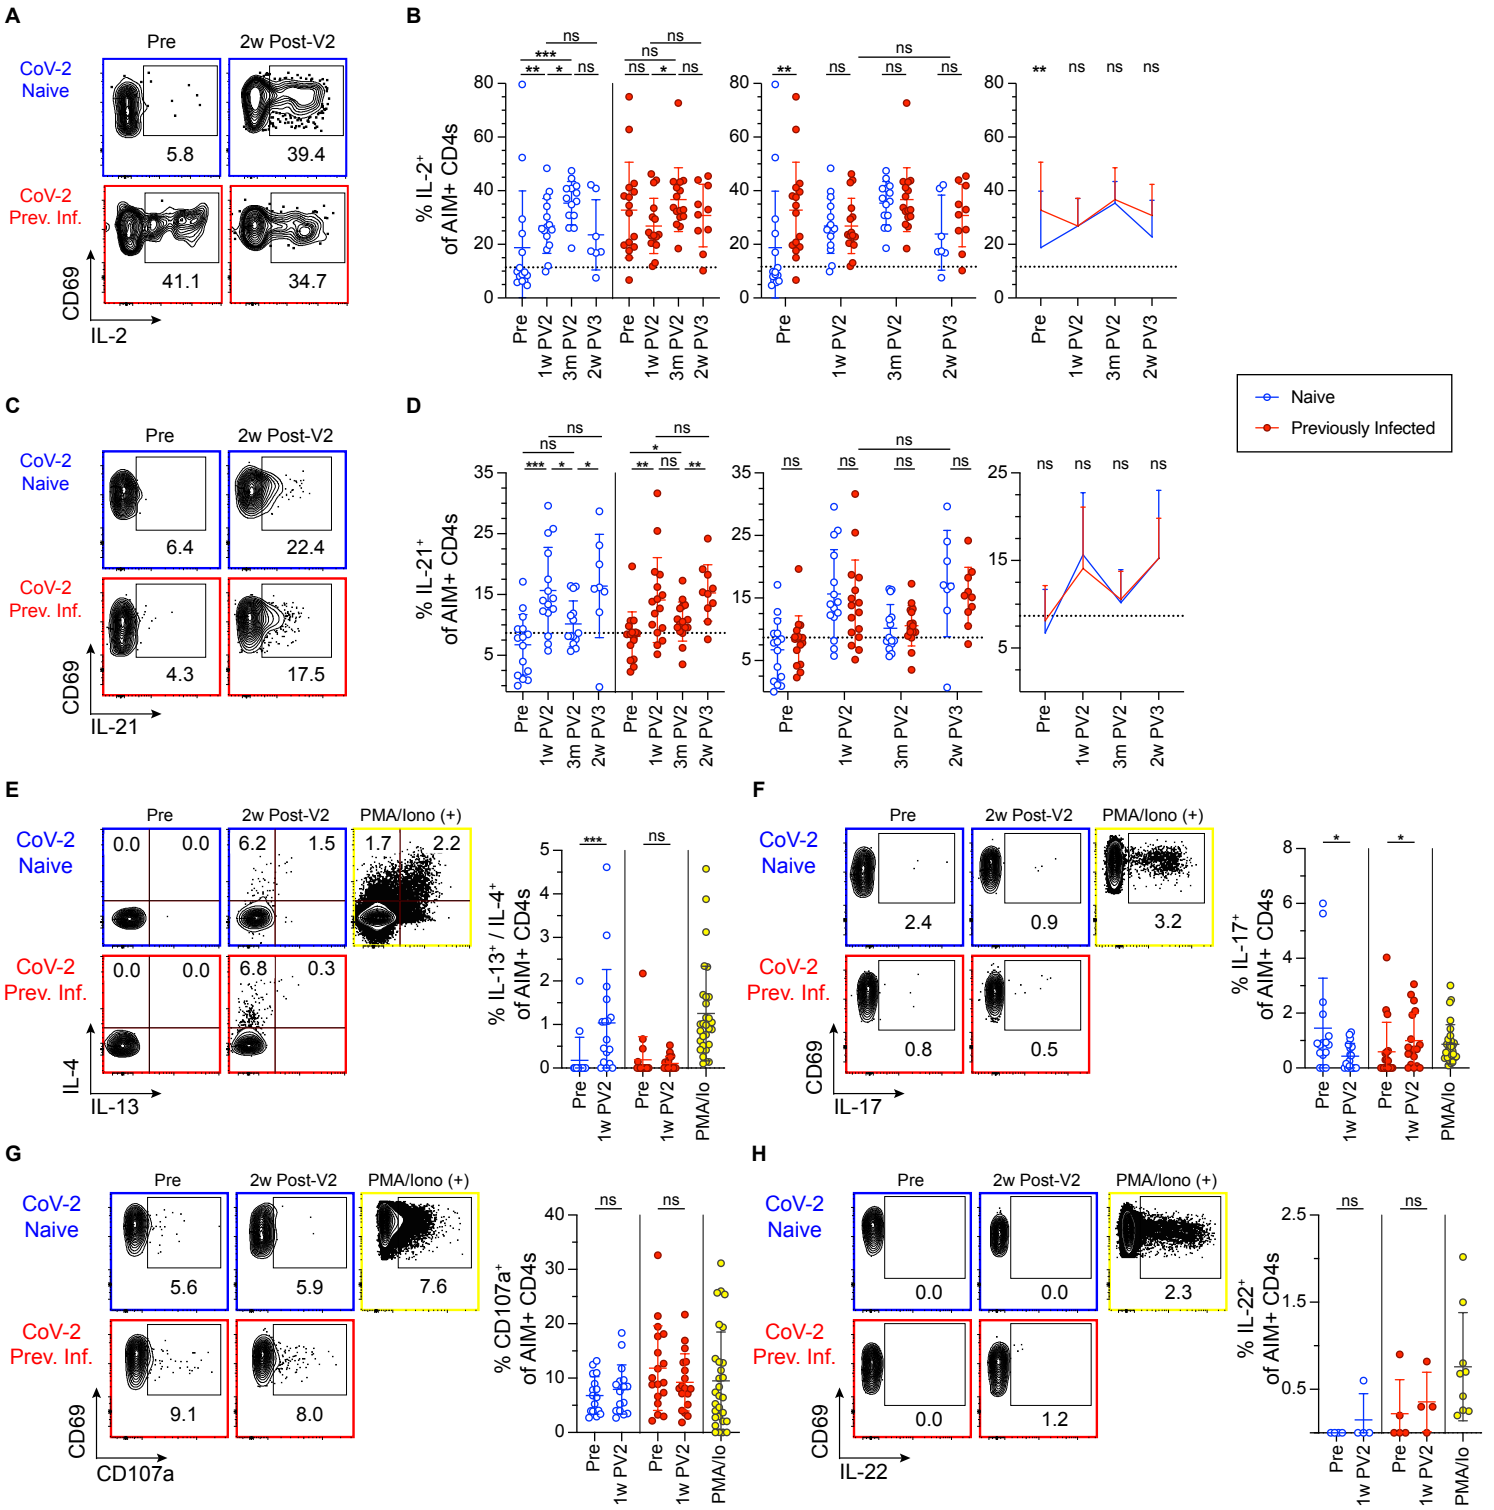

Figure S10

MN-Responsive CD4 T Cells

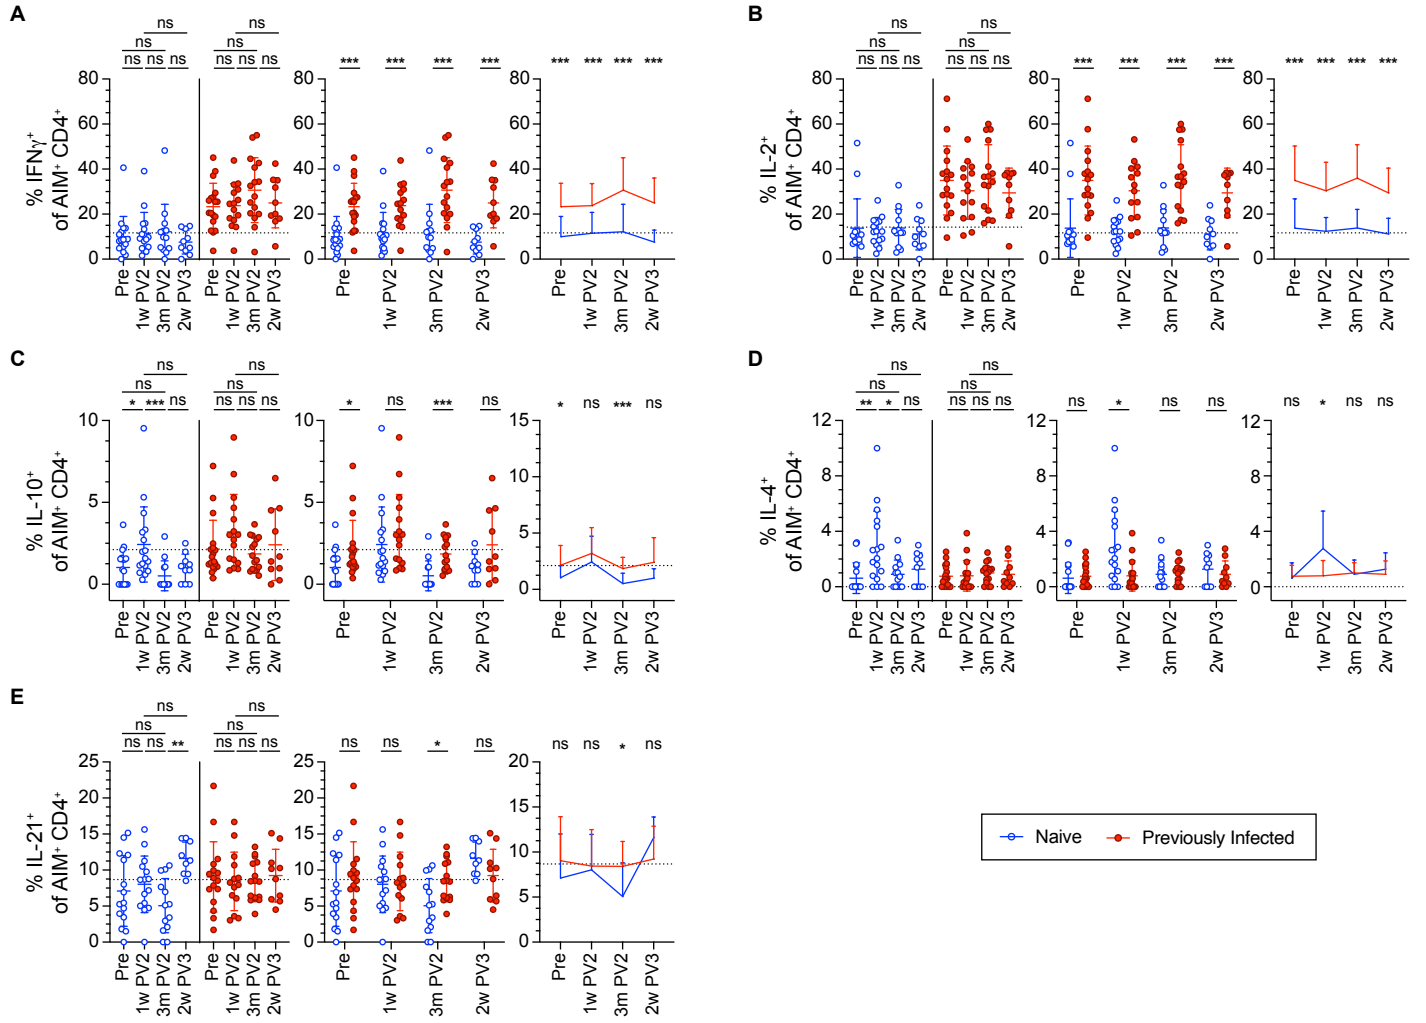

Figure S11

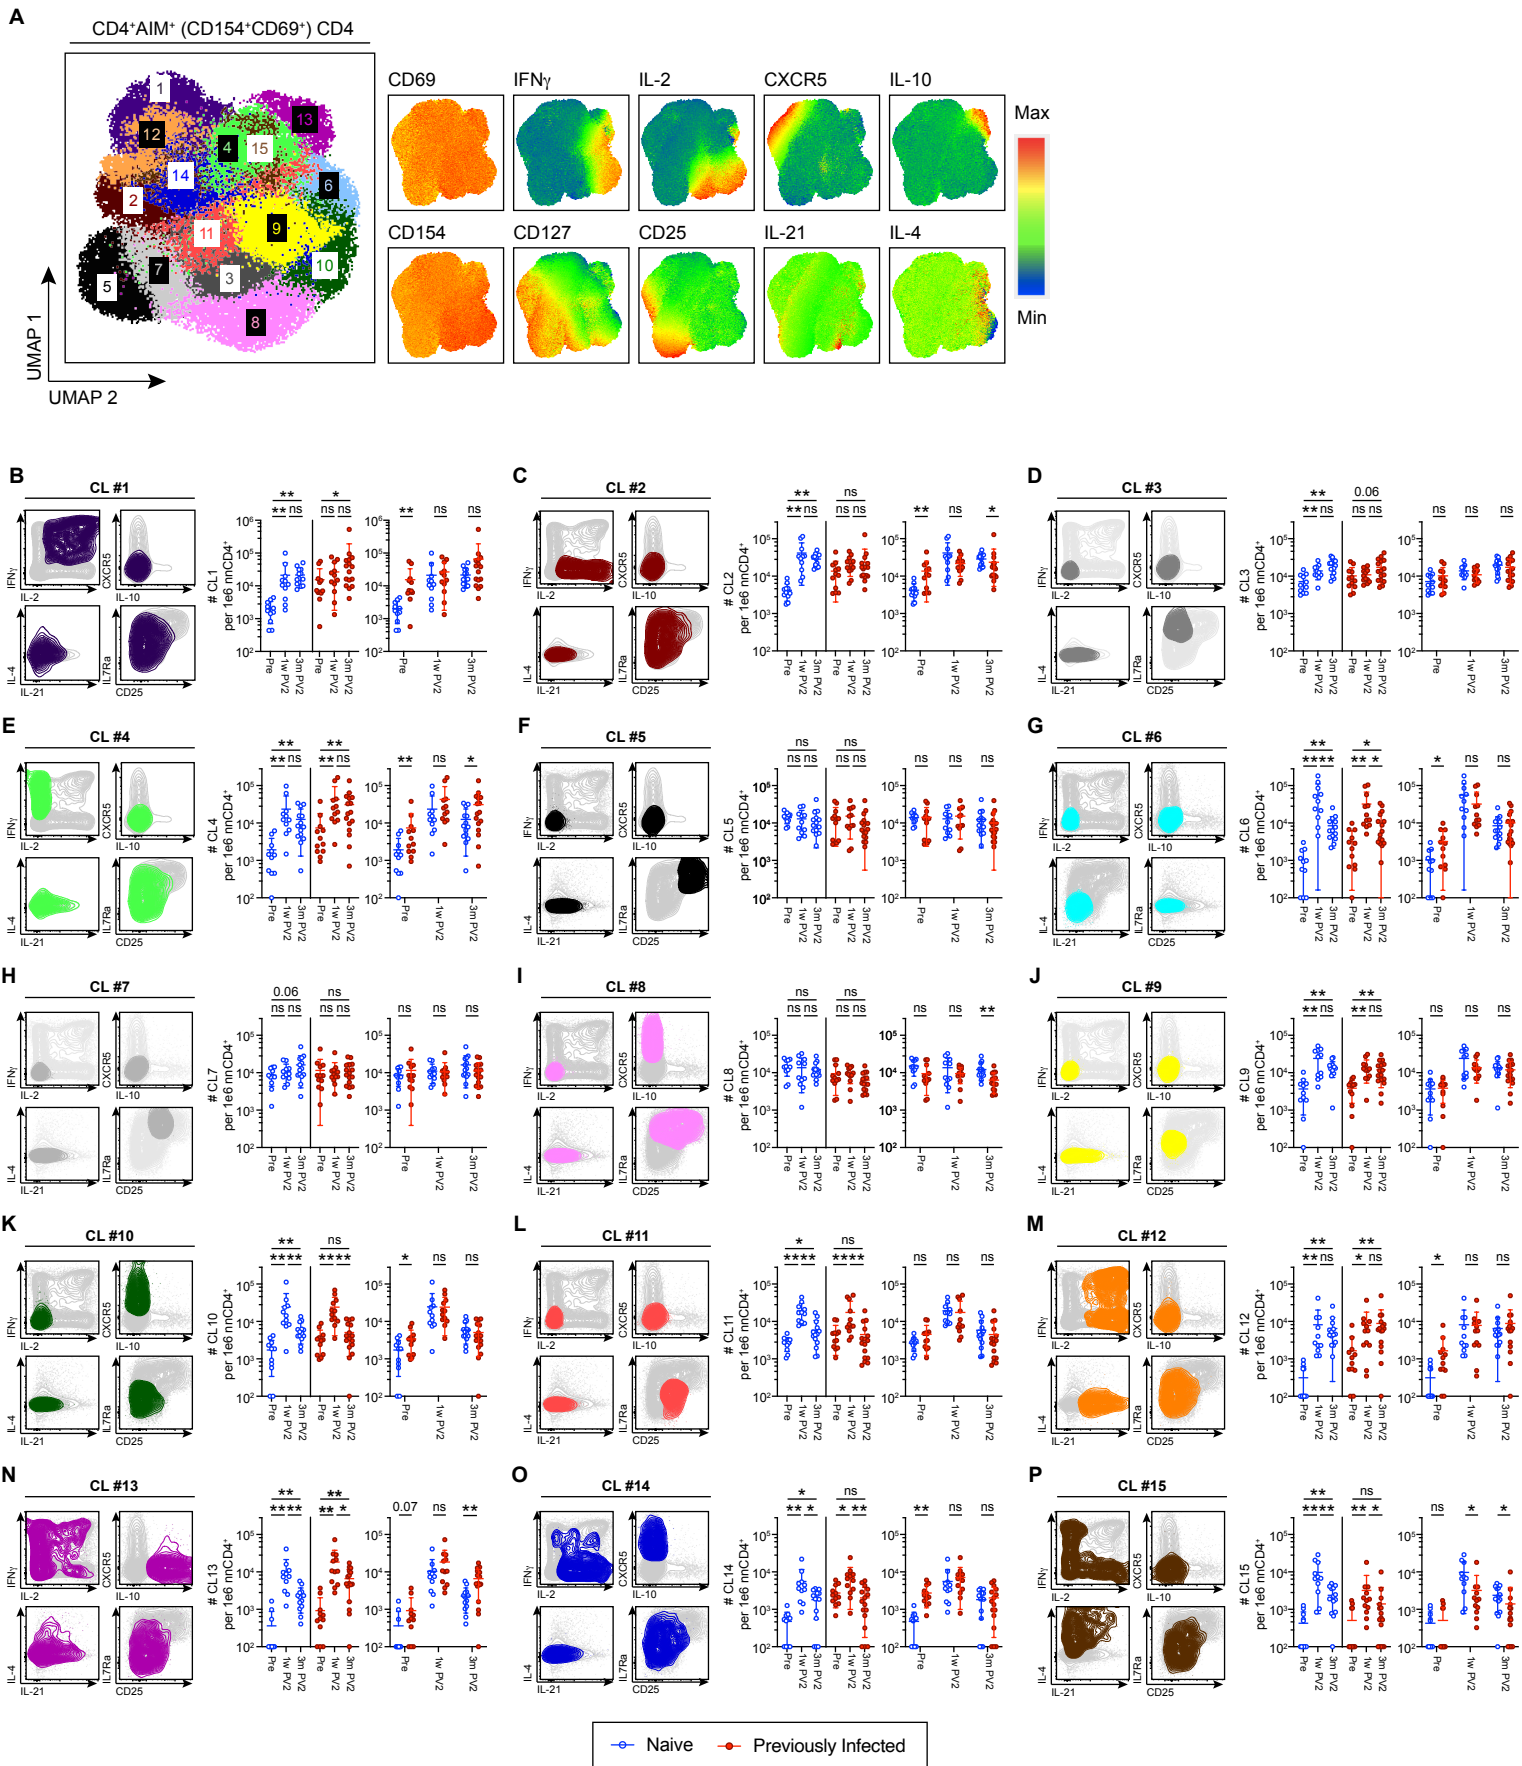

**Supplementary Table 1: Study cohort characteristics**

|                                              | <b>SARS-CoV-2 Naïve</b> | <b>SARS-CoV-2 Previously Infected</b> |
|----------------------------------------------|-------------------------|---------------------------------------|
| Number of participants                       | 22                      | 30                                    |
| Age (years)                                  | 46 (25 – 79)            | 50 (22 – 77)                          |
| Sex                                          | 64% Female, 36% Male    | 77% Female, 23% Male                  |
| Sustained symptoms (PASC) <sup>1</sup>       | NA                      | 10                                    |
| Symptom onset to pre-vaccination draw (days) | NA                      | 265 (59 – 374)                        |
| Symptom onset to vaccine dose 1 (days)       | NA                      | 305 (85 – 423)                        |
| Vaccine type <sup>2</sup>                    | 8 Moderna, 14 Pfizer    | 10 Moderna, 20 Pfizer                 |
| Vaccine dose 2 to 1 week PV2 draw (days)     | 9 (5 – 12)              | 10 (5 – 20)                           |
| Vaccine dose 2 to 3 month PV2 draw (days)    | 93 (75 – 119)           | 91 (63 – 132)                         |
| Vaccine dose 2 to 6 month PV2 draw (days)    | 161 (148 – 179)         | 160 (133 – 190)                       |
| Vaccine dose 2 to vaccine dose 3             | 232 (182 – 274)         | 233 (197 – 261)                       |
| Vaccine dose 3 to 2 week PV3 draw (days)     | 19 (13 – 47)            | 15 (10 – 22)                          |

---

<sup>1</sup> Participants surveyed at 6 months post-symptom onset for ongoing symptoms or post-acute sequelae of COVID-19 (PASC).

<sup>2</sup> mRNA-1273 (Moderna) or BNT162b2 (Pfizer-BioNTech)

## Supplementary Table 2 - T cell peptide pools

All Peptides from BEI product numbers NR-52402 (Spike), NR-52403 (Membrane), and NR-52404 (Nucleocapsid)

### Spike Peptide Pool

| BEI Peptide number | Amino Acids | Sequence           | HLA Class II epitope(s)         | HLA Class I epitope(s) | AA sequence changes in variants     |
|--------------------|-------------|--------------------|---------------------------------|------------------------|-------------------------------------|
| S-4                | 22-34       | TQLPPAYTNSFTRGVYY  |                                 | YTNSFTRGVY, LPPAYTNSF  |                                     |
| S-5                | 29-45       | TNSFTRGVYYPDKVFRS  |                                 | GVYYPDKVFR             |                                     |
| S-6                | 36-52       | VYYPDKVFRSSVLHSTQ  |                                 | KVFRSSVLH              |                                     |
| S-12               | 78-94       | RFDNPVLPFNDGVYFAS  |                                 | LPFNDGVYF              |                                     |
| S-16               | 106-122     | FGTTLDSKTQSLLVN    |                                 | TLDSKTQSL              |                                     |
| S-19               | 127-143     | VIKVCFQFCNDPFLGV   | CEFQFCNDPFLGVY                  |                        | Odel142-144, OY145D                 |
| S-20               | 134-150     | QFCNDPFLGVYHKNK    | CEFQFCNDPFLGVY                  | GVYHKNK                | ΔG142D                              |
| S-23               | 155-171     | SEFRVYSSANNCTFEYV  | SSANNCTFEYVSQPF                 |                        | ΔE156-, ΔF157-, ΔR158G              |
| S-24               | 162-178     | SANNCTFEYVSQPFMD   | SSANNCTFEYVSQPF, CTFEYVSQPFMDLE |                        |                                     |
| S-25               | 169-185     | EYVSQPFMDLEKQGN    | CTFEYVSQPFMDLE                  |                        |                                     |
| S-26               | 176-192     | LMDLEGKQGNFKNLREF  | LMDLEGKQGNFKNLR                 |                        |                                     |
| S-28               | 190-206     | REFVFNIDGYFKIYSK   | NIDGYFKIYSKHTPI                 |                        |                                     |
| S-29               | 197-213     | IDGYFKIYSKHTPINLV  | NIDGYFKIYSKHTPI                 |                        | Odel211, OL212I                     |
| S-30               | 204-220     | YSKHTPINLVRDLPQGF  |                                 | TPINLVRDL              | Odel211, OL212I, Oins214EPE         |
| S-31               | 211-227     | NLVRDLPQGFSALEPLV  | NLVRDLPQGFSALEP                 | LPQGFSAL               | ΔA222V, Odel211, OL212I, Oins214EPE |
| S-33               | 225-241     | PLVDLPIGINITRFQTL  |                                 | LPIGINITRF             |                                     |
| S-39               | 267-283     | VGYLQPRTFLLKYNENG  |                                 | YLQPRTFLL              |                                     |
| S-42               | 288-304     | AVDCALDPLSETKCTLK  |                                 | ALDPLSETK              |                                     |
| S-46               | 316-332     | SNFRVQPTESIVRFPNI  |                                 | QPTESIVRF              |                                     |
| S-50               | 334-360     | ATRFASVYAWNRKRISN  | RFASVYAWNRKRISN                 | SVYAWNRKR              | OG339D                              |
| S-54               | 372-388     | ASFSTFKCYGVSPTKLN  |                                 | KCYGVSPTK              | OS373P, OS375F                      |
| S-65               | 449-465     | YNYLYRLFRKSNLKPFE  |                                 | RLFRKSNLK              | ΔL452R                              |
| S-66               | 456-472     | FRKSNLKPFERDISTEI  |                                 | KPFERDISTEI            |                                     |
| S-73               | 505-521     | YQPYRVVLSFELLHAP   |                                 | QPYRVVVL, QPYRVVLSF    | OY505H                              |
| S-84               | 582-598     | LEILDITPCSFGGVSVI  |                                 | TPCSFGGVSV             | ΔD614G                              |
| S-88               | 610-626     | VLYQDVNCTEVPVAIHA  |                                 | YQDVNCTEV              | OD614G                              |
| S-99               | 687-703     | VASQSIAYTMSLGAEN   |                                 | SIIAYTMSL              |                                     |
| S-102              | 708-724     | SNNSIAIPTNFTISVTT  |                                 | IPTNFTISV              |                                     |
| S-104              | 722-739     | VTTEILPVSMTKTSVDC  |                                 | EILPVSMTK              |                                     |
| S-108              | 750-766     | SNLLQYGSFCTQLNRA   | NLLQYGSFCTQLNR                  |                        | ON764K                              |
| S-115              | 799-815     | GFNFSQILPDPSKPSKR  | NFSQILPDPSKPSKR                 |                        |                                     |
| S-119              | 827-843     | TLADAGFIKQYGDCLGD  | AGFIKQYGDCLGDIA                 | TLADAGFIK              |                                     |
| S-120              | 834-850     | IKQYGDCLGDIAARDLI  | AGFIKQYGDCLGDIA                 |                        |                                     |
| S-123              | 855-871     | FNGLTVLPPLLTDEMA   |                                 | GLTVLPPLL              | ON856K                              |
| S-143              | 995-1011    | RLITGRLQSLQTYVTQQ  |                                 | RLQSLQTYV              |                                     |
| S-146              | 1016-1032   | AEIRASANLAATKMSEC  |                                 | RASANLAATK             |                                     |
| S-150              | 1044-1060   | GKGYHLMSPQSAAPHGV  |                                 | HLMSFPQSA, FPQSAAPHGV  |                                     |
| S-152              | 1058-1074   | HGVVFLHVTVYVPAQEK  |                                 | VVFLHVTVY              |                                     |
| S-153              | 1065-1081   | VTYVPAQEKNFHTTAPAI |                                 | VTYVPAQEK              |                                     |
| S-163              | 1135-1151   | NTVYDPLQPELDSFKEE  |                                 | TVYDPLQPELDSFK         |                                     |
| S-180              | 1254-1270   | CKFDEDDSEPVLGKVKL  |                                 | EPVLGKVKL              |                                     |

**Membrane/Nucleocapsid Peptide Pool**

| BEI Peptide number | Amino Acids | Sequence           | HLA Class II epitope(s)                         | HLA Class I epitope(s)   | AA sequence changes in variants |
|--------------------|-------------|--------------------|-------------------------------------------------|--------------------------|---------------------------------|
| M-3                | 15-31       | KLLEQWNLVIGFLFTW   |                                                 | KLLEQWNLV                | OQ19E                           |
| M-6                | 36-52       | QFAYANRNRFYIIKLI   | QFAYANRNRFYIIK                                  | YANRNRFY                 |                                 |
| M-9                | 57-73       | LWPVTLACFVLAAYYRI  |                                                 | FVLAAYYRI                |                                 |
| M-10               | 64-80       | CFVLAAYRINWITGGI   | VLAAYRINWITGGI                                  |                          |                                 |
| M-11               | 71-87       | YRINWITGGIAIAMA    | YRINWITGGIAIAMA                                 |                          | ΔI82T                           |
| M-13               | 85-101      | ACLVGLMWLSYFIASF   | CLVGLMWLSYFIASF, MWLSYFIASFRLFAR                |                          |                                 |
| M-14               | 92-108      | WLSYFIASFRLFARTRS  | MWLSYFIASFRLFAR                                 |                          |                                 |
| M-16               | 106-122     | TRSMWSFNPETNILLNV  |                                                 | SMWSFNPET                |                                 |
| M-17               | 113-129     | NPETNILLNVPLHGTIL  | TNILLNVPLHGTILT                                 | VPLHGTIL                 |                                 |
| M-18               | 120-136     | LNVPLHGTILTRP LLES | TNILLNVPLHGTILT                                 |                          |                                 |
| M-19               | 127-143     | TILTRP LLESELVIGAV |                                                 | RPLLESEL                 |                                 |
| M-20               | 134-150     | LESELVIGAVILRGHLR  | SELVIGAVILRGHLR                                 |                          |                                 |
| M-21               | 141-157     | GAVILRGHLRIAGHHLG  | RGHLRIAGHHLGRCD                                 |                          |                                 |
| M-22               | 148-164     | HLRIAGHHLGRCDIKDL  | RGHLRIAGHHLGRCD, IAGHHLGRCDIKDLP                | RIAGHHLGR                |                                 |
| M-23               | 155-171     | HLGRCDIKDLPKEITVA  | GHHLGRCDIKDLP, LGRCDIKDLPKEITV, IKDLPKEITVATSRT |                          |                                 |
| M-24               | 162-178     | KDLPKEITVATSRTLSY  | IKDLPKEITVATSRT, KEITVATSRTLSYYK                | LPKEITVAT                |                                 |
| M-25               | 169-185     | TVATSRTLSYYKLGASQ  | KEITVATSRTLSYYK                                 |                          |                                 |
| M-26               | 176-192     | LSYYKLGASQRVAGDSG  | LSYYKLGASQRVAGD                                 |                          |                                 |
| M-27               | 183-199     | ASQRVAGDSGFAAYSRY  |                                                 | AGDSGFAAY, RVAGDSGFAAY   |                                 |
| M-28               | 190-206     | DSGFAAYSRYRIGNYK   | SGFAAYSRYRIGNYK                                 |                          |                                 |
| N-1                | Start-17    | MSDNGPQNQRNAPRITF  |                                                 | GPQNQRNAPRITF            | OP13L                           |
| N-6                | 36-52       | RSKQRRPQGLPNNTASW  |                                                 | RPQGLPNNTA               |                                 |
| N-7                | 43-59       | QGLPNNTASWFTALTQH  |                                                 | LPNNTASWF                |                                 |
| N-8                | 50-66       | ASWFTALTQHGKEDLKF  | SWFTALTQHGKEDLK                                 |                          | ΔD63G                           |
| N-10               | 64-80       | LKFPRGQGVPIINTNSSP |                                                 | FPRGQGVPI                |                                 |
| N-11               | 71-87       | GVPINTNSSPDDQIGYY  |                                                 | NTNSSPDDQIGYY            |                                 |
| N-12               | 78-94       | SSPDDQIGYYRRATRRIR | DDQIGYYRRATRRIR                                 |                          |                                 |
| N-13               | 85-101      | GYRRATRRIRGGDGKM   | DDQIGYYRRATRRIR, YRRATRRIRGGDGK                 |                          |                                 |
| N-15               | 99-115      | GKMKDLSPRWYFYLLGT  |                                                 | SPRWYFYLL                |                                 |
| N-18               | 120-136     | GLPYGANKDGIWVATE   | NKDGIIWVATEGALN                                 |                          |                                 |
| N-19               | 127-143     | KDGIWVATEGALNTPK   | NKDGIIWVATEGALN                                 |                          |                                 |
| N-22               | 148-164     | TRNPANNAIVLQLPQG   |                                                 | NPANNAIVL                |                                 |
| N-31               | 211-227     | AGNGGDAALALLLDRL   | AGNGGDAALALLLD, DAALALLLDRLNQL                  |                          |                                 |
| N-32               | 218-234     | ALALLLDRLNQLSKM    | DAALALLLDRLNQL, LLLLDRLNQLSKMS                  | LLLDRLNQL                |                                 |
| N-33               | 225-241     | DRLNQLSKMSGKQQQ    | LLLDRLNQLSKMS                                   |                          |                                 |
| N-36               | 246-262     | VTKKSAAEASKKPRQKR  | AAEASKKPRQKRTAT                                 |                          |                                 |
| N-37               | 253-269     | EASKKPRQKRTATKAYN  | AAEASKKPRQKRTAT, KKPRQKRTATKAYNV                | KPRQKRTAT                |                                 |
| N-38               | 260-276     | QKRTATKAYNVQAFGR   | KKPRQKRTATKAYNV, KRTATKAYNVQAFGR                |                          |                                 |
| N-43               | 295-311     | GTDYKHWPIAQFAPSA   | WPQIAQFAPSASAFF                                 |                          |                                 |
| N-44               | 302-318     | PQIAQFAPSASAFFGMS  | WPQIAQFAPSASAFF                                 | APSASAFFGM               |                                 |
| N-45               | 309-325     | PSASAFFGMSRIGMEVT  |                                                 | GMSRIGMEV                |                                 |
| N-47               | 316-332     | GMSRIGMEVTPSGTWLT  | PSGTWLTYTGAIKLD                                 |                          |                                 |
| N-48               | 323-339     | EVTSGTWLTYTGAIKL   | PSGTWLTYTGAIKLD                                 |                          |                                 |
| N-50               | 344-360     | PNFKDQVILLNKHIDAY  | FKDQVILLNKHIDAY                                 |                          |                                 |
| N-51               | 351-367     | ILLNKHIDAYKTFPPE   | ILLNKHIDAYKTFPPE                                |                          |                                 |
| N-52               | 358-374     | DAYKTFPPEPKKDKKK   |                                                 | KTFPPEPKK, KTFPPEPKKDKKK |                                 |

## Supplementary Table 3 - Key Resources

| <u>Reagent or Resource</u>                     | <u>Source</u>    | <u>Identifier</u> |
|------------------------------------------------|------------------|-------------------|
| <i>Antibodies</i>                              |                  |                   |
| Anti-human CD45-BUV395, Clone HI30             | Becton Dickinson | 563792            |
| Anti-human CD45-BUV496, Clone HI30             | Becton Dickinson | 750179            |
| Anti-human CD3-BUV615, Clone UCHT1             | Becton Dickinson | 612993            |
| Anti-human HLA-DR-BUV661, Clone G46-6          | Becton Dickinson | 612981            |
| Anti-human CD45RA-BUV737, Clone HI100          | Becton Dickinson | 612847            |
| Anti-human CD26-BUV805, Clone M-A261           | Becton Dickinson | 749316            |
| Anti-human CXCR3-BV421, Clone G025H7           | Biolegend        | 353716            |
| Anti-human CD45-e450, Clone HI30               | Thermo Fisher    | 49-0459-42        |
| Anti-human CD8a-BV480, Clone RPA-T8            | Becton Dickinson | 566163            |
| Anti-human CCR7-BV605, Clone G043H7            | Biolegend        | 353224            |
| Anti-human CCR6-BV650, Clone G043G3            | Biolegend        | 353426            |
| Anti-human CD27-BV711, Clone M-T271            | Biolegend        | 356430            |
| Anti-human CD137-BV750, Clone 4B4-1            | Biolegend        | 309844            |
| Anti-human CD57-BV785, Clone QA17A04           | Biolegend        | 393329            |
| Anti-human CXCR5-BB515, Clone RF8B2            | Becton Dickinson | 564624            |
| Anti-human CD45-Ax532, Clone HI30              | Thermo Fisher    | 58-0459-42        |
| Anti-human CD134-PerCP/cy5.5, Clone BerACT35   | Biolegend        | 350010            |
| Anti-human PD-L1-PE, Clone 29E.2A3             | Biolegend        | 329705            |
| Anti-human CCR4-PE/Dazzle594, CLone L291H4     | Biolegend        | 359420            |
| Anti-human CD25-PE/Cy5, Clone BC96             | Biolegend        | 302608            |
| Anti-human CD127-PE/Cy7, Clone hIL7Rm21        | Biolegend        | 560822            |
| Anti-human ICOS-APC, Clone C398.4a             | Biolegend        | 313509            |
| Anti-human CD4-SparkNIR685, Clone SK3          | Biolegend        | 344657            |
| Anti-human CD69-APC/R700, Clone FN50           | Becton Dickinson | 565154            |
| Anti-human gdTCR-APC/Fire750, Clone B1         | Biolegend        | 331228            |
| Anti-human CD19-APC/Fire810, Clone HIB19       | Biolegend        | 302271            |
| Anti-human CD69-BUV395, Clone FN50             | Becton Dickinson | 564364            |
| Anti-human IL-13 BV421, Clone JES10-5E2        | Biolegend        | 501916            |
| Anti-human CD3 eF450, Clone OKT3               | eBioscience      | 48-0037-42        |
| Anti-human CD107a BV510, Clone H4A3            | Biolegend        | 328632            |
| Anti-human IL-17A BV570, Clone BL168           | Biolegend        | 512324            |
| Anti-human CD154 Biotin, Clone hCD40L-M91      | Becton Dickinson | 552560            |
| Streptavidin BV605, Clone 563260               | Becton Dickinson | 563260            |
| Anti-human CD25 BV650, Clone M-A251            | Becton Dickinson | 563719            |
| Anti-human CD45RA BV711, Clone HI100           | Becton Dickinson | 563733            |
| Anti-human CD19 BV711, Clone SJ25C1            | Becton Dickinson | 563036            |
| Anti-human CD16 BV711, Clone 3G8               | Becton Dickinson | 563127            |
| Anti-human CD14 BV711, Clone M5E2              | Biolegend        | 301838            |
| Anti-human IL-2 BV785, Clone MQ1-17H12         | Biolegend        | 500348            |
| Anti-human CD127 AlexaFlour 488, Clone AO19D5  | Biolegend        | 351314            |
| Anti-human IL-21 PE, Clone 3A3-N2              | eBioscience      | 12-7219-42        |
| Anti-human IL-10 PE Dazzle 594, Clone JES3-9D7 | Biolegend        | 501426            |
| Anti-human CD8 PECy5, Clone RPA-T8             | Becton Dickinson | 555368            |
| Anti-human IL-4 PECy7, Clone MP4-25D2          | Biolegend        | 500824            |
| Anti-human CXCR5 Alexa Flour 647, Clone J252D4 | Biolegend        | 356906            |
| Anti-human CD4 Alexa Flour 700, Clone RPA-T4   | Becton Dickinson | 557922            |

|                                               |                        |                  |
|-----------------------------------------------|------------------------|------------------|
| Anti-human IFN $\gamma$ APCeF780, Clone 4s-B3 | eBioscience            | 47-7319-42       |
| Anti-human CD3-PerCpCy5.5, Clone HIT3a        | BioLegend              | 300328           |
| Anti-human CD14-PerCpCy5.5, Clone M5E2        | BioLegend              | 301824           |
| Anti-human CD16-PerCpCy5.5, Clone 3G8         | BioLegend              | 302028           |
| Anti-human CD19-BUV496, Clone SJ25C1          | BD                     | 612939           |
| Anti-human CD20-BV711, Clone 2H7              | BioLegend              | 302341           |
| Anti-human IgM-BV510, Clone MHM-88            | BioLegend              | Cat #314521      |
| Anti-human IgD-BUV395, Clone IA6-2            | BD                     | 563813           |
| Anti-human IgG-BV786, Clone G18-145           | BD                     | Cat #564230      |
| Anti-human CD21-SB600 Clone, HB5              | ThermoFisher           | Cat #63-0219-41  |
| Anti-human CD27-BV421, Clone M-T271           | BioLegend              | Cat #356418      |
| Anti-human CD38-AF700, Clone HIT2             | BD                     | Cat #56-0381-82  |
| Anti-human IgA-Biotin, Clone IS11-8E10        | Miltenyi               | Cat #130-113-474 |
| Anti-human IgA-PE-Vio 770, Clone IS11-8E10    | Miltenyi               | Cat #130-114-003 |
| Anti-human CD11c-PEDazzle594, Clone 3.9       | BioLegend              | Cat #301642      |
| Anti-human IgG-HRP                            | Jackson ImmunoResearch | Cat #109-035-088 |
| anti-human IgA-HRP                            | Southern Biotech       | Cat #2050-05     |

#### *Bacterial and Virus Strains*

|                   |               |          |
|-------------------|---------------|----------|
| SARS-CoV-2 (WA-1) | BEI resources | NR-52281 |
|-------------------|---------------|----------|

#### *Biological Samples*

|            |            |     |
|------------|------------|-----|
| Human PBMC | This paper | N/A |
|------------|------------|-----|

#### *Chemicals, Peptides, and Recombinant Proteins*

|                                                           |                   |                 |
|-----------------------------------------------------------|-------------------|-----------------|
| Zombie LiveDead NIR                                       | Biolegend         | 423105          |
| Fixable Live Dead BLUE BUV496                             | Thermo Scientific |                 |
| Decoy Tetramer PE/Dy594/Dy650                             | This paper        | N/A             |
| SA-PE                                                     | Agilent           | Cat#PJRS301-1   |
| RBD Tetramer PE                                           | This paper        | N/A             |
| BirA500 kit                                               | Avidity           | Cat #BirA500    |
| anti-PE magnetic beads                                    | Miltenyi Biotec   | Cat#130-048-801 |
| Streptavidin-BUV805                                       | BD                | 564923          |
| phorbol 12-myristate 13-acetate                           | Sigma-Aldrich     | Cat#P8139       |
| Ionomycin                                                 | Sigma-Aldrich     | Cat#I9657       |
| GolgiStop/monensin                                        | Becton Dickinson  | Cat#554724      |
| Paraformaldehyde solution, 4% in PBS                      | Thermo Scientific | Cat#AAJ19943K2  |
| Cytofix/Cytoperm                                          | Becton Dickinson  | Cat#554714      |
| DMSO, Cell culture grade >99.5%                           | Sigma-Aldrich     | Cat#D4540       |
| CEFX Ultra SuperStim Pool                                 | JPT               | Cat#PM-CEFX-2   |
| SARS-CoV-2 HLA Class I & II 15-mer peptides: Membrane     | BEI Resources     | Cat#NR-52403    |
| SARS-CoV-2 HLA Class I & II 15-mer peptides: Nucleocapsid | BEI Resources     | Cat#NR-52404    |
| SARS-CoV-2 HLA Class I & II 15-mer peptides: Spike        | BEI Resources     | Cat#NR-52402    |
| Dylight NHS Ester 594                                     | ThermoFisher      | 46413           |
| Dylight NHS Ester 650                                     | ThermoFisher      | 62266           |
| 1X 3,3',5,5'-Tetramethylbenzidine (TMB)                   | Invitrogen        | Cat#00-4201-56  |
| Recombinant SARS-CoV-2 (Wuhan-1) RBD Protein              | Walls et al, 2009 | N/A             |
| anti-CD40 agonist mAb                                     | Miltenyi          | 130-094-133     |

#### *Software and Algorithms*



|            |                   |     |
|------------|-------------------|-----|
| FlowJo10   | Becton Dickinson  | N/A |
| SpectroFlo | Cytek Biosciences | N/A |
| Prism      | GraphPad          | N/A |
| R          | R core team       | N/A |
